# Supplementary material for: A synergistic, global approach to revising the trypanorhynch tapeworm family Rhinoptericolidae (Trypanobatoida)
Source: PeerJ. 2022 Feb 11;10:e12865. doi: 10.7717/peerj.12865 (PMC8842684; doi:10.7717/peerj.12865)
Supplement: Supplemental Information 5 [file peerj-10-12865-s005.xlsx]

## Sheet: Rmegacantha
Specimen ID	Complete?	Host species	Maturity?	Gravid?	No. tentacles out	Position of uterus	Notes	Total length		Proglottids								Terminal (or posterior-most) proglottid (mature)		Testes (mature)					Cirrus sac (mature)		Ovary (mature)			Mehlis gland (mature)	Vitellaria (mature)		Genital pore (mature)		Terminal proglottid (gravid)		Testes (gravid)					Cirrus sac (gravid)		Ovary (gravid)			Mehlis gland (gravid)	Vitellaria (gravid)
								Total length (NOT incl. tentacles)	Length of non-proglotized region	Total number of proglottids	Number of mature proglottids (inc. gravid progs)	Number of mature proglottids (NOT inc. gravid progs)	Number of immature proglottids	Proportion of proglottids that are immature	Number of gravid proglottids	Posterior-most imm. progl. length	Posterior-most imm. progl. width	Length (mature)	Max width (mature)	Total number	Number post-poral	Number pre-poral	Length	Width	Length	Width	Number of lobes	Longest lobe length	Max total ovary width	Max length	Follicle length	Follicle width	Distance from posterior	Percentage from posterior	Length (gravid)	Max width (gravid)	Total number	Number post-poral	Number pre-poral	Length	Width	Length	Width	Number of lobes	Longest lobe length	Max width	Max length	Follicle length	Follicle width
CH-15-1	complete	Rhinoptera brasiliensis	mature	yes	4	dorsal	whole worm + hooks drawn	23730	85	39	9	8	30	0.769231	1	677	413	2532	401	57	34	23	97	109	241	265	4	523	260	NA	32	26	1852	0.731438	3260	933	NA	NA	NA	NA	NA	533	240	4	529	492	NA	NA	NA
																							96	90							34	24
																							82	102							33	24
CH-15-2	complete	Rhinoptera brasiliensis	mature	yes	3	dorsal		31607	148	49	11	7	38	0.77551	4	857	564	2016	488	57	34	23	80	188	NA	NA	4	365	404	NA	23	21	1432	0.710317	2517	1209	NA	NA	NA	NA	NA	311	200	4	258	536	NA	NA	NA
																							68	156							23	28
																							81	126							31	29
CH-15-3	complete	Rhinoptera brasiliensis	mature	yes	3	dorsal	terminal gravid prog slightly torn	26372	85	43	10	8	33	0.767442	2	880	365	2299	438	56	35	21	75	116	371	200	4	436	332	NA	24	29	1562	0.679426	2295	1169	NA	NA	NA	NA	NA	425	216	4	357	664	NA	NA	NA
																							64	87							19	26
																							67	105							18	22
CH-18-2	complete	Rhinoptera bonasus	immature	no	1	NA	hooks drawn	NA	NA	NA	NA	NA	NA	NA	NA	NA	NA	NA	NA	NA	NA	NA	NA	NA	NA	NA	NA	NA	NA	NA	NA	NA	NA	NA	NA	NA	NA	NA	NA	NA	NA	NA	NA	NA	NA	NA	NA	NA	NA
CH-18-3	complete	Rhinoptera bonasus	mature	no	1	NA	scolex drawn; TP slightly side-mounted; cirrus out in some prog	34758	127	73	21	21	52	0.712329	0	624	386	1629	494	NA	NA	NA	NA	NA	NA	NA	NA	NA	NA	NA	NA	NA	1295	0.794966	NA	NA	NA	NA	NA	NA	NA	NA	NA	NA	NA	NA	NA	NA	NA
CH-18-4	complete	Rhinoptera bonasus	mature	no	0	dorsal		29694	257	53	13	13	40	0.754717	0	803	583	2095	686	58	NA	NA	73	127	393	350	4	438	475	NA	18	30	1400	0.668258	NA	NA	NA	NA	NA	NA	NA	NA	NA	NA	NA	NA	NA	NA	NA
																							39	146							21	19
																							57	118							27	26
CH-32-1	complete	Rhinoptera bonasus	mature	yes	4	ventral	hooks drawn; cut in half for good flattening	28347	88	74	10	8	64	0.864865	2	664	569	1591	494	58	36	22	49	115	386	172	4	283	476	NA	79	77	1098	0.690132	3101	624	NA	NA	NA	NA	NA	326	218	4	523	306	NA	39	43
																							59	85							65	69																35	43
																							52	106							71	66																51	46
CH-32-2	incomplete	Rhinoptera bonasus	mature	yes	4	dorsal	terminal gravid proglottid dehisced or broken off	NA	154	74	11	8	63	0.851351	3	848	567	1807	599	58	34	24	50	116	398	269	4	370	431	90	26	46	1231	0.68124	NA	NA	NA	NA	NA	NA	NA	NA	NA	NA	NA	NA	NA	NA	NA
																							54	103							22	33
																							53	107							36	38
MS05-49-1	complete	Rhinoptera brasiliensis	mature	no	1	dorsal	tentacle barely out past basal armature	21135	140	34	7	7	27	0.794118	0	965	352	2311	467	54	29	25	66	124	273	205	4	525	343	NA	21	24	1578	0.682821	NA	NA	NA	NA	NA	NA	NA	NA	NA	NA	NA	NA	NA	NA	NA
																							81	123							29	25
																							83	101							24	31
MS05-49-2	complete	Rhinoptera brasiliensis	mature	no	0	dorsal	scolex side-mounted	18453	98	34	6	6	28	0.823529	0	712	380	2687	411	49	28	21	105	110	445	194	4	662	NA	NA	17	25	1832	0.681801	NA	NA	NA	NA	NA	NA	NA	NA	NA	NA	NA	NA	NA	NA	NA
																							55	109							15	12
																							115	93							24	22
MS05-299-1	complete	Rhinoptera brasiliensis	mature	no	4	dorsal	TP drawn	23599	158	56	9	9	47	0.839286	0	687	592	2112	619	64	40	24	92	159	511	211	4	511	535	194	21	27	1547	0.732481	NA	NA	NA	NA	NA	NA	NA	NA	NA	NA	NA	NA	NA	NA	NA
																							76	146							27	20
																							64	148							22	26
MS05-299-2	complete	Rhinoptera brasiliensis	mature	no	4	dorsal		19775	185	51	9	9	42	0.823529	0	579	396	1916	547	65	39	26	67	144	438	203	4	427	423	112	25	29	1385	0.72286	NA	NA	NA	NA	NA	NA	NA	NA	NA	NA	NA	NA	NA	NA	NA
																							65	126							19	29
																							54	148							18	20
MS05-299-3	complete	Rhinoptera brasiliensis	mature	no	4	ventral	TP very mature	31298	116	62	13	13	49	0.790323	0	752	593	2740	779	58	37	21	84	147	590	258	4	613	549	NA	32	32	2122	0.774453	NA	NA	NA	NA	NA	NA	NA	NA	NA	NA	NA	NA	NA	NA	NA
																							88	156							25	35
																							111	152							39	38
MS05-300-1	complete	Rhinoptera brasiliensis	mature	no	4	ventral	hooks drawn	23769	57	57	11	11	46	0.807018	0	608	644	2212	746	67	41	26	72	182	524	237	4	617	599	241	29	35	1643	0.742767	NA	NA	NA	NA	NA	NA	NA	NA	NA	NA	NA	NA	NA	NA	NA
																							63	174							28	29
																							100	149							24	35
MS05-300-2	complete	Rhinoptera brasiliensis	mature	no	4	ventral	very mature TP	26301	139	56	10	10	46	0.821429	0	765	584	2310	945	64	43	21	60	215	602	226	4	481	533	217	23	38	1583	0.685281	NA	NA	NA	NA	NA	NA	NA	NA	NA	NA	NA	NA	NA	NA	NA
																							88	148							24	37
																							76	218							21	34
SE-84-1	complete	Rhinoptera marginata	recently mature	no	2	NA	TP side-mounted	10658	72	30	3	3	27	0.9	0	734	361	1638	402	50	29	21	46	NA	NA	164	4	455	NA	NA	17	NA	1181	0.721001	NA	NA	NA	NA	NA	NA	NA	NA	NA	NA	NA	NA	NA	NA	NA
																							68								21	NA
																							97								17	NA
SE-138-1	complete	Rhinoptera marginata	mature	no	0	ventral		12795	73	22	5	5	17	0.772727	0	507	426	1968	404	41	21	20	105	103	443	149	4	330	243	89	21	33	1185	0.602134	NA	NA	NA	NA	NA	NA	NA	NA	NA	NA	NA	NA	NA	NA	NA
																							85	87							18	33
																							92	106							16	27
Holotype (USNM 1369398)	complete	Rhinoptera bonasus	mature	no	4		broken into several fragments	38563		56	12	12	44		0	864	632	3170	680	58	35	23	137	193			4	584	508	NA	﻿37	﻿33	2364	0.745741	NA	NA	NA	NA	NA	NA	NA	NA	NA	NA	NA	NA	NA	NA	NA
																							114	182	672	269		(in T-1)	(in T-1)		31	28
																							80	161							30	57
							minimum	10658	57	22	3	3	17	0.712329	0	507	352	1591	401	41	21	20	39	85	241	149	4	283	243	89	15	12	1098	0.602134	2295	624						311	200	4	258	306		35	43
							maximum	38563	257	74	21	21	64	0.9	4	965	644	3170	945	67	43	26	137	218	672	350		662	599	241	79	77	2364	0.794966	3260	1209						533	240		529	664		51	46
							average	25053.4	123.875	50.7647	10	9.29412	40.7647	0.804213	0.705882	736.824	494.529	2178.41	564.706	57.125	34.3333	22.7333	76.7708	133.467	449.071	224.8		476.25	436.5	157.167	27.234	32.1364	1546.47	0.708654	2793.25	983.75						398.75	218.5		416.75	499.5		41.6667	44
							standard deviation	7501.57	51.2535	15.5102	3.937	4.04297	12.8088	0.0468579	1.26317	122.471	109.762	430.164	158.126	6.56125	5.72796	1.94447	20.947	34.1531	121.747	51.6184		109.172	109.459	68.063	13.0854	13.0127	342.335	0.0451554	460.844	268.98						102.802	16.4418		132.49	148.201		8.32666	1.73205
							no. measurements	16	16	17	17	17	17	16	17	17	17	17	17	16	15	15	48	45	14	15		16	14	6	47	44	17	17	4	4						4	4		4	4		3	3
							no. worms measured	16	16	17	17	17	17	16	17	17	17	17	17	16	15	15	16	15	14	15		16	14	6	16	15	17	17	4	4						4	4		4	4		1	1
							minimum (mm)	10.658
							maximum (mm)	38.563
							average (mm)	25.0534
							standard deviation (mm)	7.50157
[truncated: 56 more columns]

## Sheet: Rmegacantha_egg_diameters
28	lactophenol
27	lactophenol
29	lactophenol
27	lactophenol
27	lactophenol
27	glycerin
26	glycerin
27	glycerin
27	glycerin
29	glycerin
26	minimum
29	maximum
27.4	average
0.966092	standard dev
1	no. worms
10	no. measurements

## Sheet: Rbutlerae
Specimen ID	Complete?	Host species	KSH specimen?	Maturity?	Gravid?	No. tentacles out	Position of uterus	Notes	Total length		Proglottids							Terminal (or posterior-most) mature proglottid		Testes (mature)					Cirrus sac (mature)		Ovary (mature)			Mehlis gland (mature)	Vitellaria (mature)		Genital pore (mature)		Terminal proglottid (gravid)		Testes (gravid)					Cirrus sac (gravid)		Ovary (gravid)			Mehlis gland (gravid)	Vitellaria (gravid)
									Total length (NOT incl. tentacles)	Length of non-proglotized region	Total number of proglottids	Number of mature proglottids (inc. gravid progs)	Number of immature proglottids	Proportion of proglottids that are immature	Number of gravid proglottids	Posterior-most imm. progl. length	Posterior-most imm. progl. width	Length (mature)	Max width (mature)	Total number	Number post-poral	Number pre-poral	Length	Width	Length	Width	Number of lobes	Longest lobe length	Max total ovary width	Max length	Follicle length	Follicle width	Distance from posterior	Percentage from posterior	Length (gravid)	Max width (gravid)	Total number	Number post-poral	Number pre-poral	Length	Width	Length	Width	Number of lobes	Longest lobe length	Max width	Max length	Follicle length	Follicle width
NT-105-1	complete	Pastinachus ater	yes	mature	gravid	4	ventral	terminal 2 progs detached	22659	164	50	7	43	0.86	2	824	349	1841	461	50	31	19	60	90	241	195	4	509	237	NA	14	31	1320	0.717002	1480	683	NA	NA	NA	NA	NA	NA	NA	4	634	NA	NA	49	76
																							53	101							19	28																36	67
																							51	108							19	30																51	71
AU-85-1	incomplete (imm)	Rhinoptera neglecta	yes	IMMATURE	NA	4	NA		NA	NA	NA	NA	NA	NA	NA	NA	NA	NA	NA	NA	NA	NA	NA	NA	NA	NA	NA	NA	NA	NA	NA	NA	NA	NA	NA	NA	NA	NA	NA	NA	NA	NA	NA	NA	NA	NA	NA	NA	NA
KA-71-1	incomplete (imm)	Himantura tutul	yes	IMMATURE	NA	4	NA		NA	NA	NA	NA	NA	NA	NA	NA	NA	NA	NA	NA	NA	NA	NA	NA	NA	NA	NA	NA	NA	NA	NA	NA	NA	NA	NA	NA	NA	NA	NA	NA	NA	NA	NA	NA	NA	NA	NA	NA	NA
KA-71-2	incomplete (imm)	Himantura tutul	yes	IMMATURE	NA	4	NA		NA	NA	NA	NA	NA	NA	NA	NA	NA	NA	NA	NA	NA	NA	NA	NA	NA	NA	NA	NA	NA	NA	NA	NA	NA	NA	NA	NA	NA	NA	NA	NA	NA	NA	NA	NA	NA	NA	NA	NA	NA
NT-87-1	complete	Rhinoptera neglecta	no	mature	no	3	dorsal?	stained with Carmine blue? mounted by I. Beveridge?	18949	155	51	5	46	0.901961	0	773	265	1529	293	50	29	21	51	118	NA	NA	NA	NA	NA	NA	21	23	979	0.640288	NA	NA	NA	NA	NA	NA	NA	NA	NA	NA	NA	NA	NA	NA	NA
																							56	112							11	15
																							60	157							13	22
SAM 44088 (holotype)	terminal end broken off	Dasyatis fluviorum	no					tentacles barely out beyond basal armature	15490	NA	42	7	35	NA	0	519	464	1085	500	60	32	28	NA	NA	NA	NA	4	NA	383	NA	16	8	696	0.641475	NA	NA	NA	NA	NA	NA	NA	NA	NA	NA	NA	NA	NA	NA	NA
																				53	32	21									14	13
																				57											15	10
SAM 22773-2 (paratype)	imm; incomplete		no					tentacles out	NA	NA	NA	NA	NA	NA	NA	NA	NA	NA	NA	NA	NA	NA	NA	NA	NA	NA	NA	NA	NA	NA	NA	NA	NA	NA	NA	NA	NA	NA	NA	NA	NA	NA	NA	NA	NA	NA	NA	NA	NA
SAM 22773-3 (paratype)	incomplete		no					tentacles out	NA	NA	NA	NA	NA	NA	NA	NA	NA	NA	NA	NA	NA	NA	NA	NA	NA	NA	NA	NA	NA	NA	NA	NA	NA	NA	NA	NA	NA	NA	NA	NA	NA	NA	NA	NA	NA	NA	NA	NA	NA
SAM 22773-6 (paratype)	imm; scol only		no					tentacles out	NA	NA	NA	NA	NA	NA	NA	NA	NA	NA	NA	NA	NA	NA	NA	NA	NA	NA	NA	NA	NA	NA	NA	NA	NA	NA	NA	NA	NA	NA	NA	NA	NA	NA	NA	NA	NA	NA	NA	NA	NA
SAM 22773-7 (paratype)	possibly incomplete		no					tentacles barely out	17895	NA	42	NA	NA	NA	0	NA	NA	NA	NA	NA	NA	NA	NA	NA	NA	NA	NA	NA	NA	NA	NA	NA	NA	NA	NA	NA	NA	NA	NA	NA	NA	NA	NA	NA	NA	NA	NA	NA	NA
SAM 22773-8 (paratype)	progs only		no						NA	NA	NA	NA	NA	NA	NA	NA	NA	NA	NA	NA	NA	NA	NA	NA	NA	NA	NA	NA	NA	NA	NA	NA	NA	NA	1735	766	NA	NA	NA	NA	NA	NA	NA	NA	NA	NA	NA	NA	NA
																																			1938	748
																																			2213	747
USNM 79701 (paratype)	incomplete		no					tentacles very far our	NA	NA	NA	NA	NA	NA	NA	NA	NA	NA	NA	NA	NA	NA	NA	NA	NA	NA	NA	NA	NA	NA	NA	NA	NA	NA	NA	NA	NA	NA	NA	NA	NA	NA	NA	NA	NA	NA	NA	NA	NA
								minimum	15490	155	42	5	35	0.86	0	519	265	1085	293	50	29	19	51	90	241	195	4	509	237		11	8	696	0.640288	1480	683								4	634			36	67
								maximum	22659	164	51	7	46	0.901961	2	824	464	1841	500	60	32	28	60	157					383		21	31	1320	0.717002	2213	766												51	76
								average	18748.2	159.5	46.25	6.33333	41.3333	0.88098	0.5	705.333	359.333	1485	418	54	31	22.25	55.1667	114.333							15.7778	20	998.333	0.666255	1841.5	736												45.3333	71.3333
								standard deviation	2982.09	6.36396	4.92443	1.1547	5.68624	0.0296708	1	163.372	99.9016	379.916	109.995	4.41588	1.41421	3.94757	4.16733	23.0188							3.27024	8.77496	312.449	0.0439522	310.563	36.396												8.14453	4.50925
								no. measurements	4	2	4	3	3	2	4	3	3	3	3	5	4	4	6	6							9	9	3	3	4	4								1	1			3	3
								no. worms	4	2	4	3	3	2	4	3	3	3	3	3	3	3	2	2							3	3	3	3	4	4								1	1			3	3
[truncated: 55 more columns]

## Sheet: Rjensenae
Specimen ID	Host species	Complete?	Maturity?	Gravid?	Tentacles out?	Position of uterus	Notes	Total length	Proglottids							Terminal proglottid (or terminal-most mat prog in grav worms)		Testes (TP or terminal-most mat prog in grav worms)					Cirrus sac (TP or terminal-most mat prog in grav worms)		Ovary (TP or terminal-most mat prog in grav worms)			Mehlis gland (TP or terminal-most mat prog in grav worms)	Vitellaria (TP or terminal-most mat prog in grav worms)		Genital pore (TP or terminal-most mat prog in grav worms)		Terminal proglottid (gravid)		Testes (gravid)					Cirrus sac (gravid)				Ovary (gravid)			Vitelline follicles (gravid)		Genital pore (gravid)
								Total length	Total number of proglottids	Number of mature proglottids (inc. gravid progs)	Number of mature proglottids (NOT inc. gravid progs)	Number of immature proglottids	Number of gravid proglottids	Posterior-most imm. progl. length	Posterior-most imm. progl. width	Length	Max width	Total number (mature prog)	Number post-poral (mature prog)	Number pre-poral (mature prog)	Length (mature prog)	Width (mature prog)	Length (term mat prog)	Width (term mat prog)	Number of lobes	Longest lobe length (term mat prog)	Max width (term mat prog)	Max length	Follicle length (mature prog)	Follicle width (mature prog)	Distance from posterior	Percentage from posterior	Length	Max width	Total number (gravid prog)	Number post-poral (gravid prog)	Number pre-pora (gravid prog)	Length (gravid prog)	Width (gravid prog)	Length (gravid prog)	Width (gravid prog)	Everted width at base (gravid prog)	Everted width at tip (gravid prog)	No. lobes	Longest lobe length (gravid prog)	Max width (gravid prog)	Follicle length (gravid prog)	Follicle width (gravid prog)	Distance from posterior (gravid prog)
CM03-31-2	R. neglecta	complete	very mature	no (a few small eggs in post uterus)	4	NA	side-mounted	3740	6	1	1	5	0	690	285	1166	461	NA	NA	NA	52	NA	NA	157	NA	333	NA	NA	32	NA	813	0.697256	NA	NA	NA	NA	NA	NA	NA	NA	NA	NA	NA	NA	NA	NA	NA	NA	NA
																					64	NA							41	NA
																					51	NA							27	NA
CM03-31-3	R. neglecta	complete (T-1 torn)	mature	no	3	dorsal	tentacles partly out	4421	10	2	2	8	0	434	151	1078	314	34	19	15	70	85	180	152	4	271	199	53	22	30	687	0.637291	NA	NA	NA	NA	NA	NA	NA	NA	NA	NA	NA	NA	NA	NA	NA	NA	NA
																					65	69							24	25
																					53	56							18	31
CM03-31-4	R. neglecta	complete	mature	yes	0	ventral	cirrus everted	4269	10	2	1	8	1	425	270	633	302	35	17	18	36	92	151	89	4	108	194	36	16	34	390	0.616114	1065	530	35	16	19	60	97	274	126	NA	NA	4	264	310	27	46	648
																					40	87							20	36								53	87								29	47
																					43	97							16	29								49	123								27	51
CM03-31-5	R. neglecta	complete	mature	yes	0	ventral	T-1 slightly side-mounted	5099	12	2	1	10	1	513	264	746	338				NA	NA	187	127	4	135	243	NA	20	36	433	0.580429	1138	505	32	16	16	NA	NA	NA	NA	NA	NA	NA	219	360	NA	NA	609
																					NA	NA							23	36
																					NA	NA							24	35
CM03-31-6	R. neglecta	complete	mature	no	0	dorsal	a little bit side-mounted	6173	9	2	2	7	0	631	180	1844	308	37	18	19	96	88	198	145	4	391	220	NA	39	39	1041	0.564534	NA	NA	NA	NA	NA	NA	NA	NA	NA	NA	NA	NA	NA	NA	NA	NA	NA
																					77	76							40	35
																					72	114							25	33
CM03-31-7	R. neglecta	complete	mature	no (a few small eggs in post uterus)	0	dorsal		6282	10	2	2	8	0	661	170	1792	308	31	18	13	85	77	198	159	4	447	198	64	51	24	1219	0.680246	NA	NA	NA	NA	NA	NA	NA	NA	NA	NA	NA	NA	NA	NA	NA	NA	NA
																					68	97							44	26
																					111	94							38	29
CM03-31-8	R. neglecta	incomplete (imm)	IMMATURE	NA	4	NA	changes from 7 to 6 hooks per row at distal end of tentacle	NA	NA	NA	NA	NA	NA	NA	NA	NA	NA	NA	NA	NA	NA	NA	NA	NA	NA	NA	NA	NA	NA	NA	NA	NA	NA	NA	NA	NA	NA	NA	NA	NA	NA	NA	NA	NA	NA	NA	NA	NA	NA
CM03-31-9	R. neglecta	incomplete (imm)	IMMATURE	NA	2	NA	metabasal barely out; basal armature drawn	NA	NA	NA	NA	NA	NA	NA	NA	NA	NA	NA	NA	NA	NA	NA	NA	NA	NA	NA	NA	NA	NA	NA	NA	NA	NA	NA	NA	NA	NA	NA	NA	NA	NA	NA	NA	NA	NA	NA	NA	NA	NA
AU-85-1	R. neglecta	incomplete (imm)	IMMATURE	no	0	NA		NA	NA	NA	NA	NA	NA	NA	NA	NA	NA	NA	NA	NA	NA	NA	NA	NA	NA	NA	NA	NA	NA	NA	NA	NA	NA	NA	NA	NA	NA	NA	NA	NA	NA	NA	NA	NA	NA	NA	NA	NA	NA
AU-85-2	R. neglecta	incomplete (imm)	IMMATURE	no	0	NA		NA	NA	NA	NA	NA	NA	NA	NA	NA	NA	NA	NA	NA	NA	NA	NA	NA	NA	NA	NA	NA	NA	NA	NA	NA	NA	NA	NA	NA	NA	NA	NA	NA	NA	NA	NA	NA	NA	NA	NA	NA	NA
CM03-29-1	A. ocellatus	incomplete (broken)	NA	NA	1	NA	broken at anterior strobila	NA	NA	NA	NA	NA	NA	NA	NA	NA	NA	NA	NA	NA	NA	NA	NA	NA	NA	NA	NA	NA	NA	NA	NA	NA	NA	NA	NA	NA	NA	NA	NA	NA	NA	NA	NA	NA	NA	NA	NA	NA	NA
CM03-29-2	A. ocellatus	complete	mature	no	3	dorsal	strobila side-mounted; clear view of genital pores	3661	8	2	2	6	0	299	186	1057	258	38	17	21	43	NA	NA	86	4	204	NA	88	20	NA	612	0.578997	NA	NA	NA	NA	NA	NA	NA	NA	NA	NA	NA	NA	NA	NA	NA	NA	NA
																					41	NA							12	NA
																					47	NA							15	NA
CM03-29-3	A. ocellatus	complete	mature	yes	4	dorsal	cirrus everted in gravid prog	5009	11	3	2	8	1	275	218	749	285	37	19	18	38	92	144	91	4	127	170	31	13	29	421	0.562083	1527	462	40	18	22	60	102	NA	NA	NA	31	NA	272	299	42	56	849
																					35	81							11	32								67	79								39	46
																					43	106							12	24								64	105								37	52
AHC 35449 (P. jensenae paratype)	"Himantura uarnak"	incomplete; scol only						NA	NA	NA	NA	NA	NA	NA	NA	NA	NA	NA	NA	NA	NA	NA	NA	NA	NA	NA	NA	NA	NA	NA	NA	NA	NA	NA	NA	NA	NA	NA	NA	NA	NA	NA	NA	NA	NA	NA	NA	NA	NA
AHC 35450 (P. jensenae paratype)	"Pastinachus sephen"	incomplete; scol only						NA	NA	NA	NA	NA	NA	NA	NA	NA	NA	NA	NA	NA	NA	NA	NA	NA	NA	NA	NA	NA	NA	NA	NA	NA	NA	NA	NA	NA	NA	NA	NA	NA	NA	NA	NA	NA	NA	NA	NA	NA	NA
AHC 35443 (P. jensenae paratype)	Rhinoptera neglecta (CM03-31)	complete			0			4380	11	2	2	9	0	372	207	1300	258	37	20	17	50	59	149	127	4	361	145	NA	29	27	851	0.654615	NA	NA	NA	NA	NA	NA	NA	NA	NA	NA	NA	NA	NA	NA	NA	NA	NA
																					39	64							22	23
																					51	87							22	28
AHC 35448 (P. jensenae paratype)	Rhinoptera neglecta (CM03-31)	complete					tentacles partly out	3357	9	1	1	8	0	446	223	897	237	35	17	18	40	54	143	93	4	195	119	54	10	24	567	0.632107	NA	NA	NA	NA	NA	NA	NA	NA	NA	NA	NA	NA	NA	NA	NA	NA	NA
																					38	62							18	22
																					31	53							18	25
							minimum	3357	6	1	1	5	0	275	151	633	237	31	17	13	31	53	143	86	4	108	119	31	10	22	390	0.562083	1065	462	32	16	16	49	79	274	126	0	31	4	219	299	27	46	609
							maximum	6282	12	3	2	10	1	690	285	1844	461	38	20	21	111	114	198	159		447	243	88	51	39	1219	0.697256	1527	530	40	18	22	67	123						272	360	42	56	849
							average	4639.1	9.6	1.9	1.6	7.7	0.3	474.6	215.4	1126.2	306.9	35.5	18.125	17.375	54.7778	80.4762	168.75	122.6		257.2	186	54.3333	24.0667	29.6667	703.4	0.620367	1243.33	499	35.6667	16.6667	19	58.8333	98.8333						251.667	323	33.5	49.6667	702
							standard deviation	1003.37	1.7127	0.567646	0.516398	1.41814	0.483046	146.517	45.5197	418.999	62.3065	2.26779	1.12599	2.44584	20.0448	17.6426	24.3531	30.2882		120.868	40.0143	20.5394	10.7413	4.9753	277.274	0.0482281	248.359	34.3948	4.04145	1.1547	3	6.73548	15.2894						28.5715	32.5115	6.62571	4.0332	128.791
							no. measurements	10	10	10	10	10	10	10	10	10	10	8	8	8	27	21	8	10		10	8	6	30	24	10	10	3	3	3	3	3	6	6						3	3	6	6	3
							no. worms	10	10	10	10	10	10	10	10	10	10	8	8	8	9	7	8	10		10	8	6	10	8	10	10	3	3	3	3	3	2	2						3	3	2	2	3
[truncated: 51 more columns]

## Sheet: Rschaeffneri
Specimen ID	Complete?	Host species	Maturity?	Gravid?	No. tentacles out	Position of uterus	Notes	Total length	Proglottids						Terminal proglottid (mature)		Terminal proglottid (gravid)		Testes					Cirrus sac		Ovary			Mehlis gland	Vitellaria		Genital pore		Eggs	Scolex
								Total length (NOT incl. tentacles)	Total number of proglottids	Number of mature proglottids (inc. gravid progs)	Number of immature proglottids	Number of gravid proglottids	Posterior-most imm. progl. length	Posterior-most imm. progl. width	Length (mature)	Max width (mature)	Length (gravid)	Max width (gravid)	Total number	Number post-poral	Number pre-poral	Length	Width	Length	Width	Number of lobes	Longest lobe length	Max width	Max length	Follicle length	Follicle width	Distance from posterior	Percentage from posterior	Egg diameter	Total length	Pars vaginalis length	Pars bulbosa length	Pars post-bulbosa length	Pars vaginalis width (at mid)	Pars bulbosa width (at mid)	Bulb length	Bulb width	Retractor muscle width (within bulbs)	Bothrial length	Bothrial width	Pars bothrialis length	Pars bothrialis width	Location of max width	Max width
KA-32-1	scol only	P. ater	NA	NA	4	NA	can't tell if immature or broken	NA	NA	NA	NA	NA	NA	NA	NA	NA	NA	NA	NA	NA	NA	NA	NA	NA	NA	NA	NA	NA	NA	NA	NA	NA	NA	NA	1323	849	485	20	157	174	448	65	20	231	99	242	234	bothria	234
																																									445	56	31	233	100
																																									446	65	NA	235
KA-44-1	scol only	P. solocirostris	NA	NA	4	NA	broken, not immature	NA	NA	NA	NA	NA	NA	NA	NA	NA	NA	NA	NA	NA	NA	NA	NA	NA	NA	NA	NA	NA	NA	NA	NA	NA	NA	NA	1242	671	555	11	173	194	529	66	23	217	96	246	213	bothria	213
																																									532	65	26	232	90
																																									535	78	16	239
KA-44-2	scol only	P. solocirostris	NA	NA	4	NA	immature, not broken	NA	NA	NA	NA	NA	NA	NA	NA	NA	NA	NA	NA	NA	NA	NA	NA	NA	NA	NA	NA	NA	NA	NA	NA	NA	NA	NA	1115	538	479	92	165	202	450	63	15	149	NA	171	302	bothria	302
																																									447	62	10	135
																																									463	65	15	157
KA-44-3	scol only	P. solocirostris	NA	NA	4	NA	immature, not broken	NA	NA	NA	NA	NA	NA	NA	NA	NA	NA	NA	NA	NA	NA	NA	NA	NA	NA	NA	NA	NA	NA	NA	NA	NA	NA	NA	1375	882	495	27	144	241	476	65	14	230	NA	258	217	bulbs	241
																																									455	65	13	246
																																									482	83	36	238
KA-44-4	scol only	P. solocirostris	NA	NA	4	NA	broken, not immature	NA	NA	NA	NA	NA	NA	NA	NA	NA	NA	NA	NA	NA	NA	NA	NA	NA	NA	NA	NA	NA	NA	NA	NA	NA	NA	NA	1080	586	514	21	192	228	487	90	20	171	89	NA	224	bulbs	228
																																									454	79	12	187	86
																																									480	80	13	206	87
BO-164-1	complete	P. solocirostris	mature	no	1	dorsal	nice strobila; scolex okay	3572	6	1	5	0	535	187	1518	277	NA	NA	46	22	24	49	77	190	119	4	374	127	109	22	33	994	0.654809	NA	1121	771	386	11	190	208	377	73	13	179	NA	327	223	TP	277
																						52	82							31	24										373	66	12	167
																						66	76							21	46										364	68	14	166
BO-164-2	complete	P. solocirostris	mature	yes	4	dorsal	whole worm drawn	2629	7	2	5	1	598	301	896	259	1605	369	45	21	24	39	82	150	84	4	125	145	63	17	32	493	0.550223	14	1068	661	403	14	163	186	383	58	13	145	81	182	232	TP (grav)	369
																						36	75	161	131					17	24	1061	0.661059	13							392	54	12	141	89
																						33	95							20	41			16							390	55	13	146	97
BO-164-3	complete	P. solocirostris	mature	no	0	dorsal	nice strobila	3422	6	1	5	0	550	235	1539	243	NA	NA	36	13	23	76	82	164	137	4	264	162	NA	22	28	861	0.559454	NA	938	536	384	24	191	200	368	68	9	152	83	175	211	TP	243
																						88	87							28	36										384	52	8	153
																						88	77							44	27										360	67	10	152
BO-177-1	incomplete	P. solocirostris	NA	NA	4	NA	terminal proglottid broken off	NA	NA	NA	NA	NA	NA	NA	NA	NA	NA	NA	NA	NA	NA	NA	NA	NA	NA	NA	NA	NA	NA	NA	NA	NA	NA	NA	1261	789	503	37	185	183	462	63	13	213	89	267	227	bothria	227
																																									444	65	12	216
																																									450	65	13	216
BO-177-2	complete	P. solocirostris	mature	no	3	ventral	slight break in posterior margin of TP; TP slightly side-mounted	4333	7	2	5	0	354	141	1325	218	NA	NA	49	25	24	59	64	172	137	4	271	NA	NA	24	29	763	0.575849	NA	1464	976	451	32	116	168	433	64	11	188	72	211	204	TP	218
																						36	75							22	45										418	57	11	180
																						NA	NA							23	26										447	61	13	196
BO-177-3	complete	P. solocirostris	mature	no	0	ventral	strobila side-mounted	4388	6	2	4	0	389	164	1658	237	NA	NA	43	19	24	69	NA	NA	170	4	354	NA	NA	31	NA	1083	0.653197	NA	1130	593	502	40	190	168	499	66	10	158	NA	205	NA	TP	237
																						56	NA							23	NA										488	61	13	167	NA
																						59	NA							23	NA										497	61	14	NA	NA
BO-177-4	complete	P. solocirostris	mature	no	1		side-mounted	3835	6	2	4	0	370	122	1416	174	NA	NA	41	21	20	42	NA	NA	158	4	289	NA	NA	18	NA	898	0.634181	NA	1066	596	441	43	188	191	426	63	10	177	61	184	252	bothria	252
																						61	NA							20	NA										416	51	11	167	81
																						69	NA							21	NA										422		10
AHC 35424	complete	P. gracilicaudus					TO; ex BO-99	6794	10	2	8	0	777	209	1452	365	NA	NA	39	15	24	77	﻿66	182	145	NA	NA	NA	NA	NA	NA	697	0.480028	NA	1619	1022	582	33	208	298	﻿590	﻿91	﻿31	﻿215	NA	229	285	bulbs	298
																						71	82																		560	96	17	197	NA
																						66	72																		573	98	32
AHC 35423	complete	P. gracilicaudus					ot measuring scol features; ex BO-99	4362	NA	NA	NA	NA	NA	NA	1345	320	NA	NA	44	24	20	64	110	128	113	NA	NA	NA	NA	54	25	649	0.482528	NA	NA	NA	NA	NA	NA	NA	NA	NA	NA	NA	NA	254	229	NA	NA
																						68	65							25	31
																						51	122							28	25
							minimum	2629	6	1	4	0	354	122	896	174	1605	369	36	13	20	33	64	128	84	4	125	127	63	17	24	493	0.480028	13	938	536	384	1	116	168	360	51	8	135	`	171	204
							maximum	6794	10	2	8	1	777	301	1658	365			49	25	24	88	122	190	170	4	374	162	109	54	46	1083	0.654809	16	1619	1022	582	92	208	298	573	98	36	246	100	327	302
							average	4166.88	6.85714	1.71429	5.14286	0.142857	510.429	194.143	1393.62	261.625			42.875	20	22.875	59.7826	82.6875	164.333	132.875	4	279.5	144.667	86	25.4286	31.4667	804.75	0.573784	14.3333	1215.54	728.462	475.385	31.1538	174	203.154	448.816	67	15.0811	188.057	86.6667	227	234.846
							standard deviation	1218.91	1.46385	0.48795	1.34519	0.377964	152.662	60.9602	228.382	59.6081			4.12094	4.17475	1.80772	15.7796	15.204	22.6068	27.1685	0	88.0381	17.5024	32.5269	8.90826	7.42454	192.687	0.0701039	1.52753	189.329	165.424	60.9064	21.1378	24.7555	35.7464	54.7618	11.0303	6.58018	34.2756	10.3625	45.0315	28.8642
							no. measurements	8	7	7	7	7	7	7	8	8			8	8	8	23	16	6	8	6	6	3	2	21	15	8	8	3	13	13	13	13	13	13	38	37	37	35	15	13	13
							no. worms measured	8	7	7	7	7	7	7	8	8			8	8	8	8	6	6	8	6	6	3	2	7	5	8	8	1	13	13	13	13	13	13	13	13	13	13	8	13	13
																								161	131							1061	0.661059
[truncated: 40 more columns]

## Sheet: Rmozambiquensis
Specimen ID	Host species	Complete?	Maturity?	Gravid?	Tentacles out?	Position of uterus	Notes	Total length	Proglottids							Terminal proglottid (mature)		Testes					Cirrus sac		Ovary			Mehlis gland	Vitellaria		Genital pore		Terminal proglottid (gravid)		Testes (gravid)							Cirrus sac (gravid)		Ovary (gravid)			Mehlis gland (gravid)	Vitellaria (gravid)
								Total length	Total number of proglottids	Number of mature proglottids (inc. gravid progs)	Number of mature proglottids (NOT inc. gravid progs)	Number of immature proglottids	Number of gravid proglottids	Posterior-most imm. progl. length	Posterior-most imm. progl. width	Length	Max width	Total number	Number post-poral	Number pre-poral	Length (mature prog)	Width (mature prog)	Length (mature prog)	Width (mature prog)	Number of lobes	Longest lobe length	Max width	Max length	Follicle length	Follicle width	Distance from posterior (mature prog)	Percentage from posterior (mature prog)	Length	Max width	Total number (gravid)	Number post-poral (gravid)	Number pre-poral (gravid)	Length (gravid prog)	Width (gravid prog)	Length (gravid prog)	Width (gravid prog)	Length (gravid prog)	Width (gravid prog)	Number of lobes (gravid prog)	Longest lobe length (gravid prog)	Max width (gravid prog)	Max length (gravid prog)	Follicle length (gravid prog)	Follicle width (gravid prog)
MZ-1-1	R. jayakari	complete	recently mature	no	2	ventral		4798	8	2	2	6	0	473	257	1562	347	26	13	13	112	86	195	152	4	427	158	NA	33	38	990	0.633803	NA	NA	NA	NA	NA	NA	NA	NA	NA	NA	NA	NA	NA	NA	NA	NA	NA
																					64	95							48	34
																					101	73							36	37
MZ-1-2	R. jayakari	complete	recently mature	no	1	ventral		3466	9	1	1	8	0	483	331	708	365	30	16	14	41	101	172	84	NA	NA	NA	NA	17	33	412	0.581921	NA	NA	NA	NA	NA	NA	NA	NA	NA	NA	NA	NA	NA	NA	NA	NA	NA
																					51	118							17	44
																					38	78							19	36
MZ-1-3	R. jayakari	complete (imm)	IMMATURE	no	3	NA	immature-strobila and proglottids not measured; 6 hooks per row distally	NA	NA	NA	NA	NA	NA	NA	NA	NA	NA	NA	NA	NA	NA	NA	NA	NA	NA	NA	NA	NA	NA	NA	NA	NA	NA	NA	NA	NA	NA	NA	NA	NA	NA	NA	NA	NA	NA	NA	NA	NA	NA
MZ-1-5	R. jayakari	complete (TP partly off)	recently mature	no	3	?	TP side-mounted	3316	6	1	1	5	0	574	211	1186	238	28	13	15	79	NA	NA	178	4	269	NA	NA	44	NA	761	0.641653	NA	NA	NA	NA	NA	NA	NA	NA	NA	NA	NA	NA	NA	NA	NA	NA	NA
																					69	NA							29	NA
																					76	NA							38	NA
MZ-1-6	R. jayakari	complete	recently mature	no	4	ventral		3487	9	1	1	8	0	528	250	877	301	30	15	15	49	85	164	118	4	235	NA	NA	23	24	576	0.656784	NA	NA	NA	NA	NA	NA	NA	NA	NA	NA	NA	NA	NA	NA	NA	NA	NA
																					47	93					(tilted)		30	27
																					51	103								29
MZ-1-7	R. jayakari	complete	recently mature	no	4	ventral	changes from 7 to 6 hooks per row at distal end of tentacle	2936	7	1	1	6	0	450	254	865	311	29	15	14	54	75	179	109	4	211	225	91	26	31	554	0.640462	NA	NA	NA	NA	NA	NA	NA	NA	NA	NA	NA	NA	NA	NA	NA	NA	NA
																					50	103							24	37
																					44	111							23	30
MZ-3-1	R. jayakari	complete (curvy)	mature	no	4	dorsal	TP slightly side-mounted	3796	6	1	1	5	0	559	227	962	297	NA	NA	NA	NA	NA	NA	168	4	187	NA	NA	44	NA	539	0.560291	NA	NA	NA	NA	NA	NA	NA	NA	NA	NA	NA	NA	NA	NA	NA	NA	NA
																					NA	NA							36	NA
																					NA	NA							19	NA
MZ-3-4	R. jayakari	complete	recently mature	no	3	ventral		2617	6	1	1	5	0	352	220	809	260	28	14	14	NA	NA	NA	NA	NA	NA	NA	NA	20	35	553	0.68356	NA	NA	NA	NA	NA	NA	NA	NA	NA	NA	NA	NA	NA	NA	NA	NA	NA
																					NA	NA							26	34
																					NA	NA							29	29
MZ-3-5	R. jayakari	complete	very mature	no	3	ventral		4235	7	1	1	6	0	753	256	1275	356	26	12	14	78	94	183	146	4	283	238	79	30	46	816	0.64	NA	NA	NA	NA	NA	NA	NA	NA	NA	NA	NA	NA	NA	NA	NA	NA	NA
																					74	74							45	64
																					73	82							38	46
MZ-3-6	R. jayakari	complete	recently mature	no	2	dorsal	TP slightly side-mounted	2785	5	1	1	4	0	381	175	977	232	29	14	15	39	NA	NA	105	4	219	NA	NA	22	NA	634	0.648925	NA	NA	NA	NA	NA	NA	NA	NA	NA	NA	NA	NA	NA	NA	NA	NA	NA
																					48	NA							27	NA
																					61	NA							16	NA
MZ-3-7	R. jayakari	complete	recently mature	no	0	ventral	tentacles retracted	3634	7	1	1	6	0	603	263	1108	276	30	15	15	41	79	184	146	4	230	156	51	36	30	720	0.649819	NA	NA	NA	NA	NA	NA	NA	NA	NA	NA	NA	NA	NA	NA	NA	NA	NA
																					62	74							45	38
																					54	90							35	38
MZ-4-2	R. jayakari	complete (torn)	gravid	yes	4	ventral	torn at T-4; tentacles partly out	1628	9	2	1	7	1	527	254	NA	NA	23	12	11	85	92	179	120	4	278	161	NA	29	33	NA	NA	1815	676	NA	NA	NA	NA	NA	NA	NA	220	125	NA	NA	NA	NA	NA	NA
																					74	96							23	26
																					114	86							30	28
MZ-4-3	R. jayakari	complete	gravid	yes	1	dorsal		5912	10	2	1	8	1	606	304	NA	NA	NA	NA	NA	NA	NA	NA	NA	NA	NA	NA	NA	NA	NA	NA	NA	1968	690	30	15	15	72	116	NA	NA	NA	NA	NA	NA	NA	NA	NA	NA
																																						64	115
																																						65	127
MZ-4-4	R. jayakari	complete	recently mature	no	4	ventral	tentacles very far out; TP side-mounted	3921	6	1	1	5	0	527	215	1168	238	NA	NA	NA	69	NA	NA	130	4	262	180	NA	33	18	703	0.601884	NA	NA	NA	NA	NA	NA	NA	NA	NA	NA	NA	NA	NA	NA	NA	NA	NA
																					69	NA							32	26
																					88	NA							33	25
MZ-4-5	R. jayakari	complete	mature	no	1	dorsal		4452	7	2	2	5	0	347	221	1457	270	31	14	17	54	61	177	142	4	373	163	NA	32	37	948	0.650652	NA	NA	NA	NA	NA	NA	NA	NA	NA	NA	NA	NA	NA	NA	NA	NA	NA
																					63	46							38	32
																					72	76							34	40
MZ-4-6	R. jayakari	complete	mature	no	4	ventral		3700	10	1	1	9	0	578	338	1092	350	28	15	13	58	103	181	123	4	271	189	NA	21	33	769	0.704212	NA	NA	NA	NA	NA	NA	NA	NA	NA	NA	NA	NA	NA	NA	NA	NA	NA
																					73	96							28	36
																					73	73							31	38
MZ-4-7	R. jayakari	complete	gravid	yes	2	NA	gravid but gravid TP broken; cirrus out	3692	6	1	0	5	1	517	335	NA	NA	NA	NA	NA	NA	NA	NA	NA	NA	NA	NA	NA	NA	NA	NA	NA	1513	NA	NA	NA	NA	NA	NA	NA	NA	NA	NA	NA	NA	NA	NA	NA	NA
MZ-4-8	R. jayakari	complete	recently mature	no	1 (barely)	ventral	single tentacle barely out	3355	7	1	1	6	0	514	253	1123	308	32	18	14	63	80	189	125	4	313	188	110	32	31	791	0.704363	NA	NA	NA	NA	NA	NA	NA	NA	NA	NA	NA	NA	NA	NA	NA	NA	NA
																					49	87							37	27
																					51	87							31	38
MZ-4-9	R. jayakari	complete	gravid	yes	2	dorsal?	HOLOTYPE	4460	9	2	1	7	1	485	250	NA	NA	27	12	15	NA	NA	NA	NA	4	NA	NA	NA	NA	NA	NA	NA	1407	688	NA	NA	NA	41	79	NA	NA	267	129	NA	143	226	117	29	33
																																						39	91									19	36
																																						45	84									14	38
MZ-4-10	R. jayakari	complete	mature	no	3	ventral	TP slightly broken	4083	7	2	2	5	0	470	232	1217	419	35	17	18	70	93	206	147	4	281	266	119	33	46	762	0.62613	NA	NA	NA	NA	NA	NA	NA	NA	NA	NA	NA	NA	NA	NA	NA	NA	NA
																					44	111							22	42
																					46	88							28	50
MZ-4-11	R. jayakari	complete	gravid	yes	2	ventral	TP slightly broken	5478	10	2	1	8	1	574	227	NA	NA	NA	NA	NA	NA	NA	NA	NA	4	NA	NA	NA	NA	NA	NA	NA	1970	427	30	14	16	49	82	70	74	229	135	NA	243	132	81	27	27
																																						56	86	60	78							22	23
																																						64	80	66	124							35	23
MZ-4-12	R. jayakari	complete	mature	no	4	ventral	tentacles partly out	4591	8	2	2	6	0	469	212	1222	331	31	14	17	56	94	182	139	4	310	201	NA	30	27	778	0.636661	NA	NA	NA	NA	NA	NA	NA	NA	NA	182	139	NA	NA	NA	NA	NA	NA
																					59	100							37	27
																					75	93							31	25
							minimum	1628	5	1	0	4	0	347	175	708	232	23	12	11	38	46	164	84	4	187	156	51	16	18	412	0.560291	1407	427	30	14	15	39	79	60	74	182	125		143	132	81	14	23
							maximum	5912	10	2	2	9	1	753	338	1562	419	35	18	18	114	118	206	178	4	427	266	119	48	64	990	0.704363	1970	690	30	15	16	72	127	70	124	267	139		243	226	117	35	38
							average	3825.81	7.57143	1.38095	1.14286	6.19048	0.238095	512.857	251.667	1100.5	306.188	28.9375	14.3125	14.625	63.5778	88.2222	182.583	133.25	4	276.6	193.182	90	30.4	34.4048	706.625	0.64132	1734.6	620.25	30	14.5	15.5	55	95.5556	65.3333	92	224.5	132					24.3333	30
							standard deviation	964.713	1.5353	0.497613	0.478091	1.36452	0.436436	92.3863	43.3709	229.526	53.0173	2.7921	1.74045	1.70783	17.9057	14.3788	10.715	23.9291	0	62.2607	36.29	26.8514	7.78276	8.38425	154.268	0.0384111	261.142	128.982	0	0.707107	0.707107	11.9373	18.4737	5.03322	27.7849	34.8951	6.21825					7.52773	6.57267
							total no. measurements	21	21	21	21	21	21	21	21	16	16	16	16	16	45	36	12	16	17	15	11	5	50	42	16	16	5	4	2	2	2	9	9	3	3	4	4					6	6
							no. worms measured	21	21	21	21	21	21	21	21	16	16	16	16	16	18	15	12	16	17	15	11	5	20	17	16	16	5	4	2	2	2	3	3	1	1	4	4					2	2
[truncated: 51 more columns]

## Sheet: Rhexacantha
Specimen ID	Complete?	Maturity?	Gravid?	No. tentacles out	Position of uterus	Notes	Total length	Proglottids						Terminal proglottid (mature)		Terminal proglottid (gravid)		Testes					Cirrus sac		Ovary			Mehlis gland	Vitellaria		Genital pore		Eggs	Scolex															Ratios
							Total length (NOT incl. tentacles)	Total number of proglottids	Number of mature proglottids (inc. gravid progs)	Number of immature proglottids	Number of gravid proglottids	Posterior-most imm. progl. length	Posterior-most imm. progl. width	Length (mature)	Max width (mature)	Length (gravid)	Max width (gravid)	Total number	Number post-poral	Number pre-poral	Length	Width	Length	Width	Number of lobes	Longest lobe length	Max width	Max length	Follicle length	Follicle width	Distance from posterior	Percentage from posterior	Egg diameter	Total length	Pars vaginalis length	Pars bulbosa length	Pars post-bulbosa length	Pars vaginalis width (at mid)	Pars bulbosa width (at mid)	Bulb length	Bulb width	Retractor muscle width (within bulbs)	Bothrial length	Bothrial width	Pars bothrialis length	Pars bothrialis width	Location of max width	Max width	Scolex width : length
BJ-1-1	complete; broken	mature	no	0	dorsal	two breaks in TP	NA	4	1	3	0	79	120	NA	NA	NA	NA	31	12	19	66	68	122	102	4	203	119	93	29	34	NA	NA	NA	686	383	326	7	208	212	360	64	10	162	NA	153	264	NA	NA	NA
																					74	66							16	30										301	62	9	153	NA
																					60	71							29	25										285	76	11	166	NA
BJ-1-2	complete; broken	mature	no	0	dorsal	small break in TP	3024	5	1	4	0	347	145	1130	206	NA	NA	31	14	17	67	70	113	126	4	232	114	105	27	33	658	0.582301	NA	1317	687	632	0	139	144	604	50	11	164	88	216	244	bothria	244	2.81557
																					93	83							22	41										610	68	10	171	90
																					66	53							34	22										607	51	10
BJ-1-3	complete; broken	mature	no	0	dorsal	break in anterior strobila and small break in TP	6413	6	2	4	0	267	227	1252	288	NA	NA	31	15	16	NA	NA	181	154	4	286	232	NA	29	39	758	0.605431	NA	725	405	362	0	225	172	358	72	12	NA	NA	NA	NA	NA	NA	NA
																					NA	NA							34	30										371	56	8
																					NA	NA							35	47												11
BJ-355-1	complete; in pieces	mature	no	4	NA	in three pieces	4822	10	2	8	0	572	190	1649	207	NA	NA	35	17	18	67	64	NA	NA	NA	NA	NA	122	35	35	973	0.590055	NA	868	494	429	0	180	192	387	75	15	186	NA	251	312	bothria	312	1.58333
																					69	61							28	32										454	70	17	192
																					81	67							34	32
BJ-355-2	complete; in pieces	mature	no	0	NA	in three pieces; side-mounted	4310	9	2	7	0	NA	NA	1175	277	NA	NA	NA	NA	NA	61	NA	NA	125	4	NA	NA	NA	27	NA	708	0.602553	NA	1368	1045	699	8	143	176	511	54	14	214	76	245	328	bothria	328	3.18598
																					52	NA							19	NA										515	78	12	218	89
																					53	NA							26	NA										520	75	13
BJ-317-1	complete	immature	no	3	NA	scolex drawn	NA	NA	NA	NA	NA	NA	NA	NA	NA	NA	NA	NA	NA	NA	NA	NA	NA	NA	NA	NA	NA	NA	NA	NA	NA	NA	NA	835	448	393	0	225	222	409	79	11	135	106	172	227	NA	NA	NA
																																								400	71	12	123	115
																																								394	81	12
BJ-317-2	complete	mature	no	0	ventral	TP drawn	2589	6	1	5	0	461	148	820	195	NA	NA	33	16	17	42	65	115	82	4	180	141	62	26	29	520	0.634146	NA	934	456	468	0	229	224	502	82	12	171	75	NA	NA	NA	NA	NA
																					47	74							28	27										427	81	11	179	88
																					52	62							25	31										436	84	12	175
BJ-317-3	complete	mature	no	0	ventral	break in strob between T-1 and T-2	2545	6	1	5	0	392	232	1078	212	NA	NA	35	17	18	64	63	139	153	4	198	154	105	38	26	679	0.62987	NA	871	427	425	0	240	209	499	81	13	167	95	NA	NA	NA	NA	NA
																					44	80							33	24										431	78	16	153	124
																					47	98							28	21										483	72	15
BJ-317-4	incomplete	mature	no	NA	NA	free mature proglottid only	NA	NA	NA	NA	NA	NA	NA	1303	328	NA	NA	NA	NA	NA	NA	NA	185	72 (base)	4	379	241	169	36	33	832	0.638526	NA	NA	NA	NA	NA	NA	NA	NA	NA	NA	NA	NA	NA	NA	NA	NA	NA
																							(everted)	36 (tip)					32	38
																								(everted)					29	45
BJ-672-1	complete	immature	no	3	NA		2918	6		6	0	NA	NA	NA	NA	NA	NA	NA	NA	NA	NA	NA	NA	NA	NA	NA	NA	NA	NA	NA	NA	NA	NA	1196	677	527	0	226	259	504	97	25	206	95	291	362	NA	NA	NA
																																								529	102	30	219	117
																																								532		31	207
BJ-707-1	complete	mature	no	0	dorsal	whole worm drawn	2710	7	1	6	0	408	184	967	205	NA	NA	30	14	16	39	85	106	104	4	218	122	78	NA	NA	533	0.551189	NA	925	485	463	0	237	221	438	85	15	174	98	235	288	bothria	288	1.68403
																					41	79																		467	73	14	187	87
																					37	80																		452	85	13		92
						minimum	2545	4	1	3	0	79	120	820	195	0	0	30	12	16	37	53	106	82	4	180	114	62	16	21	520	0.551189	0	686	383	326	7	139	144	285	50	8	123	75	153	227		244	1.58333
						maximum	6413	10	2	8	0	572	232	1649	288			35	17	19	93	98	181	154	4	379	241	169	38	47	973	0.638526		1368	1045	699	8	240	259	610	102	31	219	124	291	362		328	3.18598
						average	3666.38	6.55556	1.375	5.33333	0	360.857	178	1153	227.143			32.2857	15	17.2857	58.1905	71.6111	129.333	120.857	4	242.286	160.429	104.857	29.125	32.0952	707.625	0.604259		972.5	550.7	472.4	7.5	205.2	203.1	456.643	74.1481	13.9655	177.238	95.6667	223.286	289.286	bothria	293	2.31723
						standard deviation	1393.83	1.87824	0.517549	1.58114	0	156.123	42.5245	260.749	38.2859			2.05866	1.82574	1.1127	14.75	10.8527	27.6887	26.8479	0	69.1393	53.8233	34.4162	5.37557	7.02784	149.957	0.0298282		238.574	202.913	117.362	0.707107	37.8588	32.7802	84.4824	12.5137	5.55159	25.9767	14.2461	47.584	48.0857		36.5696	0.804698
						no. measurements	8	9	8	9	9	7	7	7	7			7	7	7	21	18	6	7	8	7	7	7	24	21	8	8		10	10	10	2	10	10	28	27	29	21	15	7	7		4	4
						no. specimens	8	9	8	9	9	7	7	7	7			7	7	7	7	7	6	7	8	7	7	7	8	7	8	8		10	10	10	2	10	10	10	10	10	9	7	7	7		4	4
[truncated: 29 more columns]
